# Supplementary material for: Assessment of Ocriplasmin Effects on the Vitreoretinal Compartment in Porcine and Human Model Systems
Source: J Ophthalmol. 2017 Oct 29;2017:2060765. doi: 10.1155/2017/2060765 (PMC5682056; doi:10.1155/2017/2060765)
Supplement: Supplementary file 2 [file 2060765.f2.pdf]

### Supplemental Table 1

[illegible]

**Legend:**

X – animal not available for follow up

? – observation to be confirmed at following time point, OCT not conclusive

HRS – presence of vitreous hyper-reflective spots

PVD – presence of posterior vitreous detachment

SRF – presence of subretinal fluid

Ok – no specific observation on OCT

Clouds, shadow – OCT image obscured, no readout possible
