# Supplementary material for: Assessment of Ocriplasmin Effects on the Vitreoretinal Compartment in Porcine and Human Model Systems
Source: J Ophthalmol. 2017 Oct 29;2017:2060765. doi: 10.1155/2017/2060765 (PMC5682056; doi:10.1155/2017/2060765)
Supplement: Supplementary file 5 [file 2060765.f5.pdf]

**Supplemental Figure 2**

A. Rab7 – Ocriplasmin co-localization in Müller cells

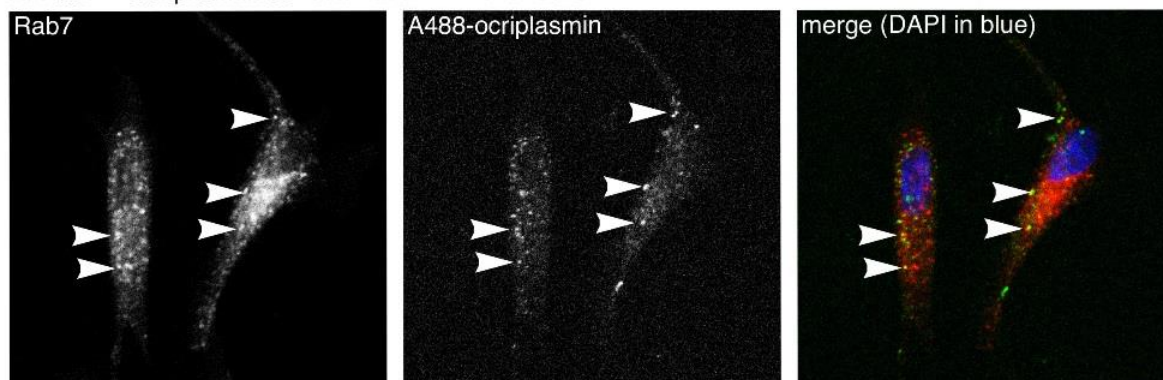

B. Rab7 – Ocriplasmin co-localization in RPE cells

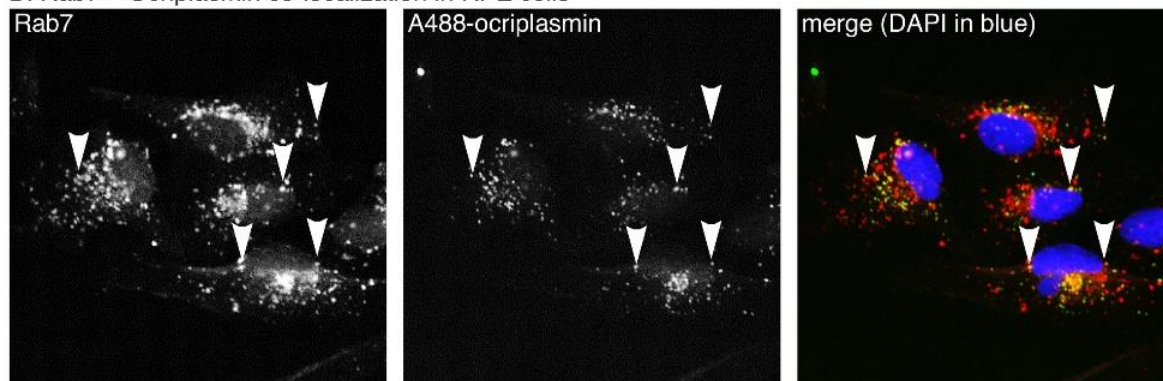

C. Rab11 – Ocriplasmin co-localization in Müller cells

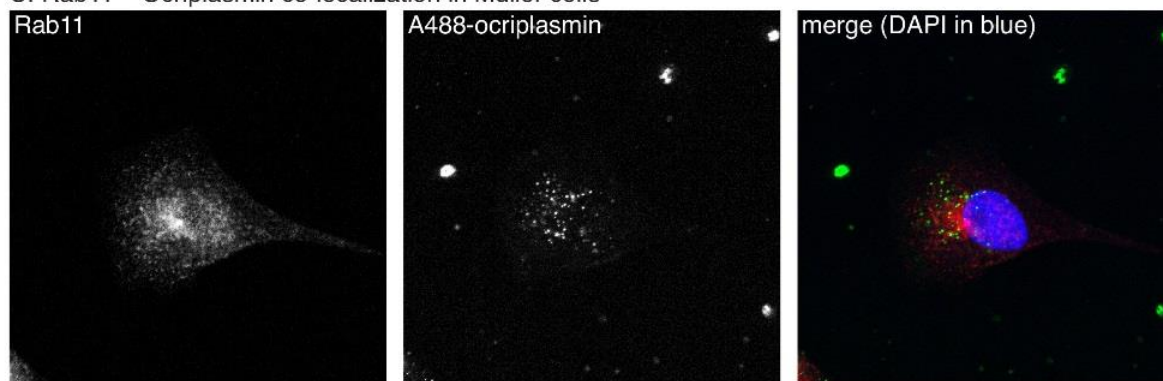

D. Rab11 – Ocriplasmin co-localization in RPE cells

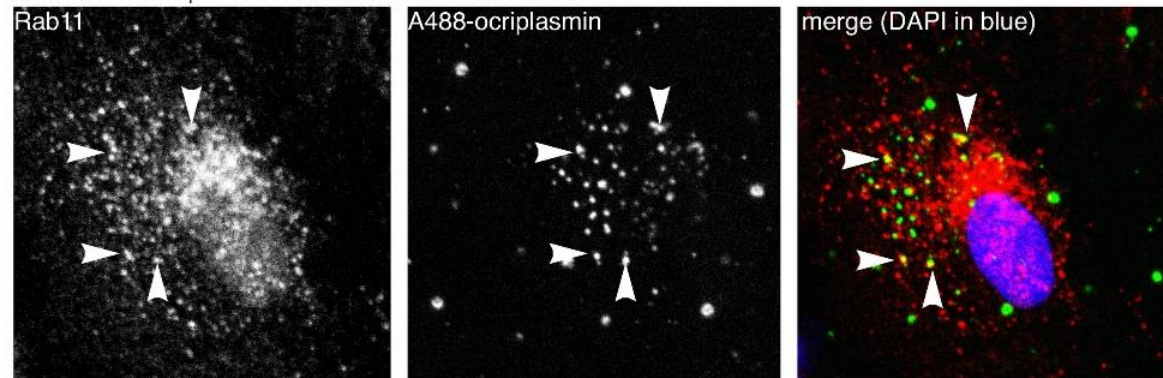

Detailed and separate fluorescence channel assessment of co-localization of Alexa-488 ocriplasmin with endosomal transport vehicles by confocal microscopy.
